# Supplementary material for: The effect of acid/alkali treatment on the catalytic combustion activity of manganese oxide octahedral molecular sieves
Source: Royal Society of Chemistry journal article supplement (doi:10.1039/c6ra27700d), 2017-01-01
Supplement: c6ra27700d1.pdf [file c6ra27700d1.pdf]

### Supplementary Information

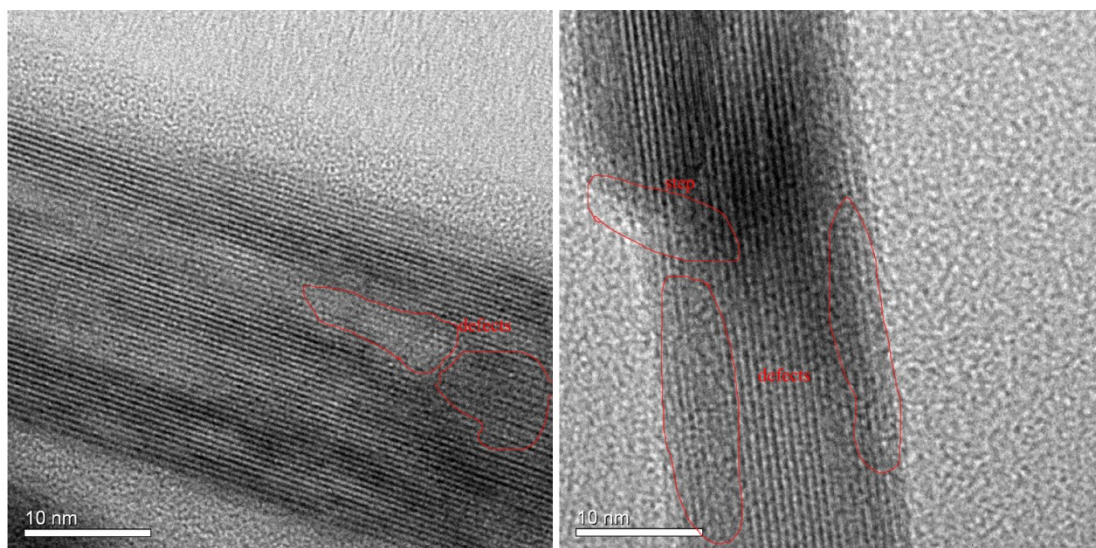

**Fig. S1** HRTEM images of HAc-OMS-2

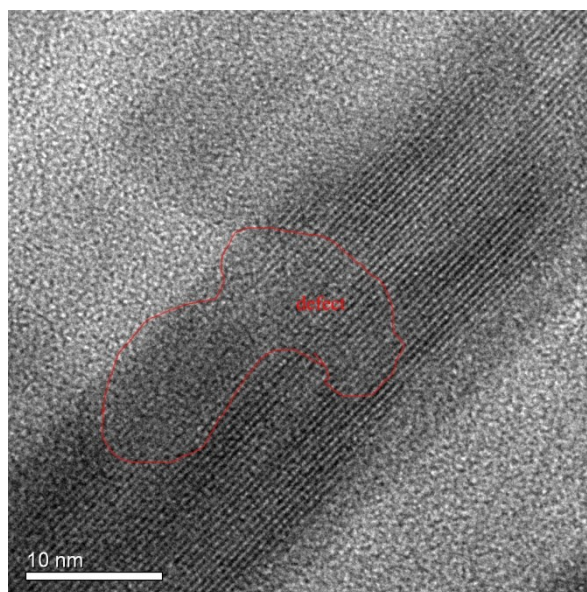

**Fig. S2** HRTEM image of HCl-OMS-2

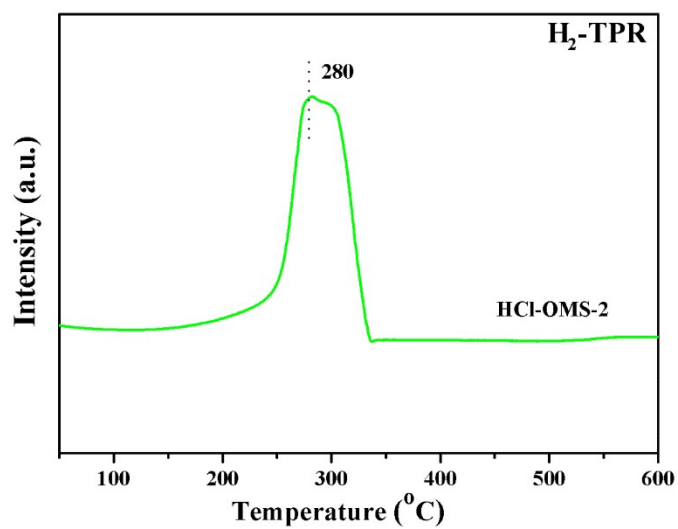

Fig. S3 H<sub>2</sub>-TPR profile of HCl-OMS-2

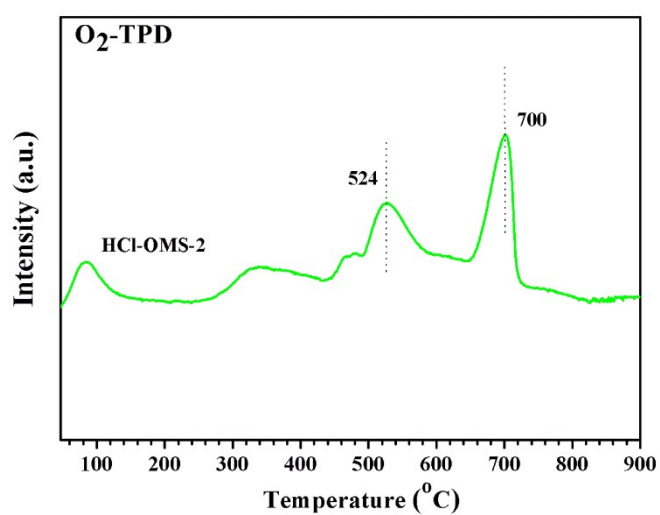

Fig. S4 O<sub>2</sub>-TPD profile of HCl-OMS-2

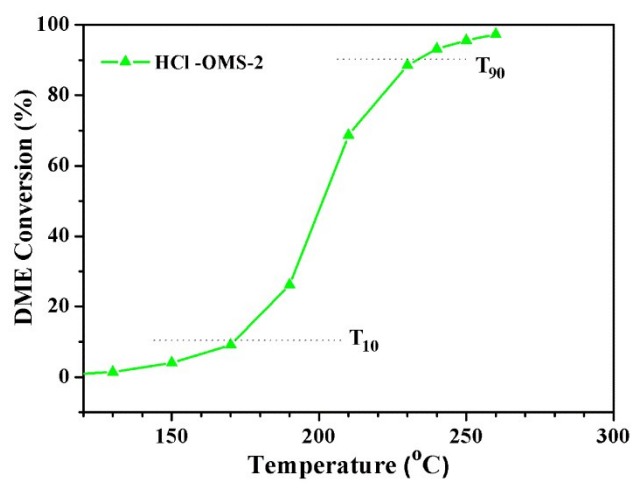

Fig.S5 DME combustion activity of HCl-OMS-2

Table S1 The reported DME combustion performance in recent 5 years

| Catalyst                                                             | T <sub>10</sub> /°C | T <sub>90</sub> /°C | Reference |
|----------------------------------------------------------------------|---------------------|---------------------|-----------|
| HAc-OMS-2                                                            | 170                 | 230                 | Our work  |
| $\alpha$ -MnO <sub>2</sub> @ $\gamma$ -MnO <sub>2</sub>              | 171                 | 220                 | 1         |
| LaMnO <sub>3</sub>                                                   | 210                 | 295                 | 2         |
| CoFe <sub>2</sub> O <sub>4</sub>                                     | ca.300              | ca.410              | 3         |
| Zn <sub>0.8</sub> Mn <sub>0.2</sub> Fe <sub>2.4</sub> O <sub>4</sub> | 257                 | 276                 | 4         |
| Cu-OMS-2                                                             | 171                 | 180                 | 5         |
| 2PtAl                                                                | 106                 | ca.310              | 6         |

## Reference 1 :

1. B. Zhang, G. Cheng, W. Ye, X. Zheng, H. Liu, M. Sun, L. Yu, Y. Zheng and X. Cheng, *Dalton Trans*, 2016, **45**, 8.
2. R. Dinamarca, C. Sepúlveda, E. J. Delgado, O. Peña, J. L. G. Fierro and G. Pecchi, *Journal of Catalysis*, 2016, **338**, 47-55.
3. Z.-Y. Tian, P. Mountapmbeme Kouotou, A. El Kasmi, P. H. Tchoua Ngamou, K. Kohse-Höinghaus, H. Vieker, A. Beyer and A. Götzhäuser, *Proceedings of the Combustion Institute*, 2015, **35**, 2207-2214.
4. Z. Beji, M. Sun, L. S. Smiri, F. Herbst, C. Mangeney and S. Ammar, *RSC Advances*, 2015, **5**, 65010-65022.
5. M. Sun, L. Yu, F. Ye, G. Q. Diao, Q. Yu, Z. F. Hao, Y. Y. Zheng and L. X. Yuan, *Chem. Eng. J.*, 2013, **220**, 320-327.
6. S. Colussi, A. Gayen, J. Llorca, C. de Leitenburg, G. Dolcetti and A. Trovarelli, *Industrial & Engineering Chemistry Research*, 2012, **51**, 7510-7517.

Table S2 Some of the reported metal oxide catalysts for toluene combustion

| Catalyst                     | T <sub>10</sub> /°C | T <sub>90</sub> /°C | Reference |
|------------------------------|---------------------|---------------------|-----------|
| HAc-OMS-2                    | 170                 | 194                 | Our work  |
| NiO                          | 212                 | 266                 | 7         |
| Porous MnO <sub>2</sub>      | ca.130              | 217                 | 8         |
| $\epsilon$ -MnO <sub>2</sub> | ca.170              | 229                 | 9         |
| $\alpha$ -MnO <sub>2</sub>   | 210                 | 225                 | 10        |

|                                                                        |        |        |    |
|------------------------------------------------------------------------|--------|--------|----|
| Co <sub>3</sub> O <sub>4</sub>                                         | 110    | 215    | 11 |
| Ag-Mn/SBA-15                                                           | ca.220 | ca.255 | 12 |
| Au-β-MnO <sub>2</sub>                                                  | 170    | 220    | 13 |
| Au/Ce <sub>0.6</sub> Zr <sub>0.3</sub> Y <sub>0.1</sub> O <sub>2</sub> | 218    | 265    | 14 |
| 0.13Ag/Mn <sub>2</sub> O <sub>3</sub>                                  | 110    | 215    | 15 |
| γ-MnO <sub>2</sub>                                                     | <200   | 252    | 16 |
| α-MnO <sub>2</sub>                                                     | 214    | 237    | 17 |

Reference II :

7. G. Bai, H. Dai, J. Deng, Y. Liu and K. Ji, *Catal. Commun.*, 2012, **27**, 148-153.
8. Y. Du, Q. Meng, J. Wang, J. Yan, H. Fan, Y. Liu and H. Dai, *Microporous Mesoporous Mater.*, 2012, **162**, 199-206.
9. F. Shi, F. Wang, H. Dai, J. Dai, J. Deng, Y. Liu, G. Bai, K. Ji and C. T. Au, *Appl. Catal., A*, 2012, **433-434**, 206-213.
10. F. Wang, H. Dai, J. Deng, G. Bai, K. Ji and Y. Liu, *Environ Sci Technol*, 2012, **46**, 4034-4041.
11. G. Bai, H. Dai, J. Deng, Y. Liu, F. Wang, Z. Zhao, W. Qiu and C. T. Au, *Appl. Catal., A*, 2013, **450**, 42-49.
12. Z. Qu, Y. Bu, Y. Qin, Y. Wang and Q. Fu, *Appl. Catal., B*, 2013, **132-133**, 353-362.
13. Q. Ye, J. Zhao, F. Huo, D. Wang, S. Cheng, T. Kang and H. Dai, *Microporous Mesoporous Mater.*, 2013, **172**, 20-29.
14. W. Tan, G. Guo, J. Deng, S. Xie, H. Yang, Y. Jiang and H. Dai, *Industrial & Engineering Chemistry Research*, 2014, **53**, 18452-18461.
15. J. Deng, S. He, S. Xie, H. Yang, Y. Liu, G. Guo and H. Dai, *Environmental Science & Technology*, 2015, **49**, 11089-11095.
16. W. Si, Y. Wang, Y. Peng, X. Li, K. Li and J. Li, *Chem Commun (Camb)*, 2015, **51**, 14977-14980.
17. G. Cheng, L. Yu, B. Lan, M. Sun, T. Lin, Z. Fu, X. Su, M. Qiu, C. Guo and B. Xu, *Mater. Res. Bull.*, 2016, **75**, 17-24.
